# Supplementary material for: Storage of Lithium-Ion by Phase Engineered MoO3 Homojunctions
Source: MDPI journal article supplement (doi:10.3390/nano12213762), 2022-10-26
Supplement: s1 [file s1]

# **Supplementary Materials**

**For**

## **Storage of Lithium-Ion by Phase Engineered MoO<sub>3</sub> Homojunctions**

Dickon H. L. Ng <sup>1,†,\*</sup>, Sheng Li <sup>2,†</sup>, Jun Li <sup>2</sup>, Jinning Huang <sup>3</sup>, Yingxue Cui <sup>2</sup>, Jiabiao

Lian <sup>2</sup> and Chuan Wang <sup>3,\*</sup>

<sup>1</sup> School of Science and Engineering, The Chinese University of Hong Kong  
(Shenzhen), Longgang, Shenzhen 518172, China

<sup>2</sup> Key Laboratory of Zhenjiang, Institute for Energy Research, Jiangsu University,  
Zhenjiang 212013, China

<sup>3</sup> Institute of Advanced Synthesis, School of Chemistry and Molecular Engineering,  
Jiangsu National Synergetic Innovation Center for Advanced Materials, Nanjing Tech  
University, 30 Puzhu South Road, Nanjing 211800, China

\* Correspondence: dickonng@cuhk.edu.cn (D.N.); ias\_cwang@njtech.edu.cn (C.W.)

† These two authors contributed equally to this work.

## Supplementary Figures:

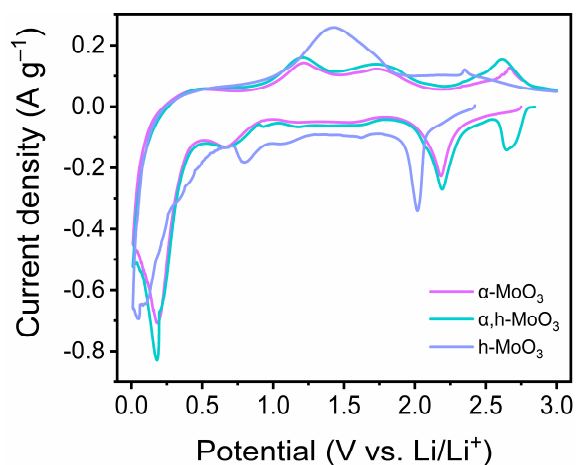

**Figure S1.** The first CV curves at  $0.1 \text{ mV s}^{-1}$  of Sample B:  $\alpha/h\text{-MoO}_3$ ; Sample A:  $h\text{-MoO}_3$ ; and Sample C:  $\alpha\text{-MoO}_3$ , respectively.

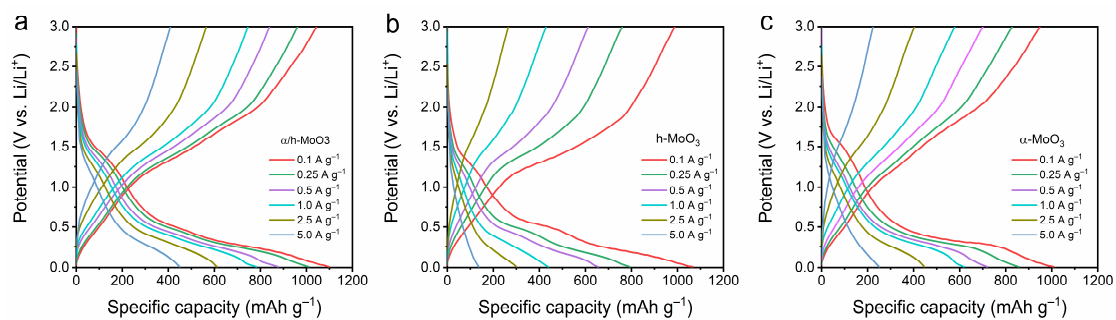

**Figure S2.** Discharge-charge curves at different current densities of (a)  $\alpha/h\text{-MoO}_3$ , (b)  $h\text{-MoO}_3$ , and (c)  $\alpha\text{-MoO}_3$ .
